# Supplementary material for: Identification of an emphysema-associated genetic variant near TGFB2 with regulatory effects in lung fibroblasts
Source: eLife. 2019 Jul 25;8:e42720. doi: 10.7554/eLife.42720 (PMC6693893; doi:10.7554/eLife.42720)
Supplement: Supplementary file 1. [file elife-42720-supp1.xlsx]

## Sheet: ST1.SubjectCharacteristics
	COPDGene NHW	COPDGene NHW GOLD 2,3,4	COPDGene AA	COPDGene AA GOLD 2,3,4	ECLIPSE
N	6458	2724	3158	786	1519
Age	62.1 (8.8)	64.7 (8.2)	54.7 (7.2)	58.9 (8.2)	63.6 (7.0)
Sex, % male	52.3	55.7	56	55.1	65.8
Pack-years	47.2 (25.8)	56.1 (27.7)	38.4 (21.5)	42.5 (23.0)	50.3 (27.3)
FEV1, % of predicted	73.4 (26.2)	49.8 (18.0)	80.7 (25.7)	52.4 (17.7)	47.2 (15.6)
Nonemphysematous	0.52 (0.27)	0.35 (0.26)	0.63 (0.24)	0.39 (0.27)	0.19 (0.20)
Mild Centrilobular	0.26 (0.11)	0.26 (0.11)	0.24 (0.11)	0.28 (0.11)	0.27 (0.13)
Moderate Centrilobular	0.14 (0.16)	0.25 (0.18)	0.08 (0.13)	0.21 (0.18)	0.37 (0.19)
Severe Centrilobular	0.02 (0.06)	0.05 (0.08)	0.01 (0.04)	0.04 (0.06)	0.05 (0.06)
Panlobular	0.01 (0.03)	0.03 (0.05)	0.01 (0.03)	0.02 (0.04)	0.02 (0.04)
LAA-950	0.07 (.11)	0.13 (0.13)	0.03 (0.08)	0.09 (0.13)	0.15(0.14)
NHW – non-Hispanic white, AA – African-American. GOLD – global obstructive lung disease spirometric grade
LHE measures and LAA-950 are proportions ranging from 0 to 1.

## Sheet: ST2.PrimaryGWASByCohort
	LHE pattern	Lead SNP	EAF	Effect Allele	P Value Meta	Effect Meta	SE Effect Meta	Direction Meta	I2	Effect Size in NHW	P Value NHW	Effect Size in AA	P Value AA	Effect Size in ECLIPSE	P Value ECLIPSE
	Moderate	rs56077333	0.67	a	2.17e-13	0.0162	0.0022	+++	0	0.0182	2.06e-10	0.0147	0.000179	0.0095	0.188
		rs17368582	0.14	t	8.06e-12	0.0241	0.0035	+++	31	0.0232	6.56e-09	0.0154	0.135	0.0397	0.000205
		rs56113850	0.59	t	1.49e-09	-0.016	0.0026	---	0	-0.0194	1.08e-06	-0.0146	0.000207	-0.0077	0.364
		rs796395	0.52	a	6.12e-09	0.0129	0.0022	+++	44	0.0154	5.56e-09	0.0052	0.3438	0.0076	0.2415
		rs138641402	0.38	a	3.3e-08	0.0135	0.0025	+++	0	0.0155	1.39e-07	0.0079	0.1921	0.009	0.2141
	Nonemphysematous	rs138641402	0.38	a	4.18e-08	-0.0214	0.0039	---	69	-0.0281	1.02e-08	-0.022	0.0548	-0.0051	0.502
		rs7170068	0.78	a	4.84e-12	0.028	0.004	+++	8	0.0303	1.86e-07	-0.0314	7.6e-06	-0.0152	0.116
		rs17368659	0.86	t	6.32e-11	0.0356	0.0054	+++	0	0.0347	1.81e-07	0.0424	0.0239	0.0356	0.00148
		rs28929474	0.98	t	6.15e-09	-0.0709	0.0122	-?-	0	0.0731	4.42e-06	NA	NA	0.0677	0.000372
	Panlobular	rs11852372	0.35	a	7.12e-12	-0.0031	0.0005	---	0	-0.0034	1.14e-07	-0.0025	0.00294	-0.0037	0.0168
		rs76756075	0.02	t	2e-08	-0.0068	0.0012	---	0	-0.0048	0.0685	-0.0073	2.01e-07	-0.0087	0.168
		rs78070126	0.97	t	2.84e-08	0.0063	0.0011	+++	62	0.006	0.000339	0.0052	0.00111	0.0159	0.0003
		rs145770770	0.99	a	3.84e-08	-0.0151	0.0028	-?-	72	-0.0174	5.54e-09	NA	NA	-0.0031	0.655
	Severe	rs9788721	0.38	t	3.44e-15	-0.0051	0.0006	---	82	-0.0073	1.25e-12	-0.003	0.00141	-0.007	0.00316
		rs379123	0.4	t	3.7e-08	-0.0036	0.0007	---	44	-0.0048	1.52e-06	-0.003	0.00115	-0.0006	0.781
	LHE - local histogram emphysema.
	EAF - effect allele frequency in 1000 Genomes CEU population.
	NA - variant not tested since MAF < 1% in cohort of interest.

## Sheet: ST3.GWASInverseNormal
	LHE pattern	Lead SNP	EAF	Effect Allele	P Value Meta	Effect Meta	SE Effect Meta
	Moderate	rs56077333	0.67	a	1.58e-11	0.091	0.014
		rs17368582	0.14	t	1.39e-08	0.121	0.021
		rs56113850	0.59	t	3.08e-07	-0.071	0.014
		rs796395	0.52	a	1.42e-09	0.082	0.014
		rs138641402	0.38	a	2.8e-07	0.077	0.015
	Nonemphysematous (Normal Lung)	rs138641402	0.38	a	1.41e-07	-0.079	0.015
		rs7170068	0.78	a	1.95e-09	0.092	0.015
		rs17368659	0.86	t	5.97e-08	0.117	0.022
		rs28929474	0.98	t	3.11e-09	-0.29	0.049
	Panlobular	rs11852372	0.35	a	7.34e-11	-0.079	0.012
		rs76756075	0.02	t	0.000297	-0.121	0.034
		rs78070126	0.97	t	0.078	0.052	0.029
		rs145770770	0.99	a	0.002	-0.159	0.052
	Severe	rs9788721	0.38	t	2.22e-14	-0.094	0.012
		rs379123	0.4	t	0.037	-0.026	0.012
	LHE - local histogram emphysema.
	EAF - effect allele frequency in 1000 Genomes CEU population.

## Sheet: ST4.SpirometryandCOPD
SNP	Coded Allele	LHE				FEV1			FEV1/FVC			COPD
		LHE pattern	beta (se)	P	Validated	N	beta (se)	P	N	beta (se)	P	N	beta (se)	P
rs56077333	A	Moderate Centrilobular	0.016 (0.002)	2.2e-13	yes	395850	-0.021 (0.002)	1.523e-17	395813	-0.014 (0.003)	2.22e-08	260000	0.099 (0.011)	8.963e-21
rs17368582	T		0.024 (0.004)	8.1e-12	no	396722	-0.002 (0.004)	0.4996	396685	-0.007 (0.004)	0.0621	260000	0.014 (0.015)	0.3558
rs56113850	T		-0.016 (0.003)	1.5e-09	yes	403292	0.011 (0.002)	7.168e-06	403255	0.006 (0.002)	0.0172	260000	-0.034 (0.01)	0.001454
rs796395	A		0.013 (0.002)	6.1e-09	yes	396723	-0.012 (0.002)	3.477e-07	396686	-0.009 (0.002)	0.000198	260000	0.053 (0.010)	7.426e-08
rs1690789	T		0.013 (0.002)	6.3e-09	yes	396721	-0.012 (0.002)	2.236e-07	396684	-0.009 (0.002)	0.000125	260000	0.051 (0.010)	3.379e-07
rs138641402	A		0.01 (0.003)	3.3e-08	no
rs138641402	A	Nonemphysematous	-0.021 (0.004)	4.2e-08	no
rs7170068	A		0.028 (0.004)	4.8e-12	yes	395851	0.015 (0.003)	1.581e-07	395814	0.018 (0.003)	1.55e-09	260000	-0.086 (0.012)	3.367e-12
rs17368659	T		0.036 (0.005)	6.3e-11	yes	396723	0.002 (0.004)	0.5032	396686	0.007 (0.004)	0.0398	260000	-0.014 (0.015)	0.3436
rs28929474	T		-0.071 (0.012)	6.2e-09	no	396723	0.019 (0.008)	0.02081	396686	0.013 (0.009)	0.141	260000	0.148 (0.035)	2.152e-05
rs11852372	A	Panlobular	-0.003 (0.0005)	7.1e-12	yes	395850	0.023 (0.002)	7.642e-20	395813	0.015 (0.002)	2.32e-09	260000	-0.093 (0.011)	1.134e-18
rs76756075	T		-0.007 (0.001)	2e-08	no	396303	-0.01 (0.01)	0.3282	396266	-0.007 (0.01)	0.51
rs78070126	T		0.006 (0.001)	2.8e-08	no	403293	0.001 (0.007)	0.9291	403256	0.009 (0.007)	0.229	260000	0.026 (0.03)	0.3849
rs145770770	A		-0.015 (0.003)	3.8e-08	yes	395484	0.013 (0.009)	0.1426	395447	0.020 (0.009)	0.0264
rs9788721	T	Severe Centrilobular	-0.005 (0.0007)	3.7e-08	yes	396722	0.022 (0.002)	2.554e-19	396685	0.015 (0.002)	2.97e-09	260000	-0.102 (0.010)	1.557e-23
rs379123	T		-0.004 (0.0007)	3.7e-08	no	404165	0.001 (0.002)	0.6219	404128	-0.004 (0.002)	0.0851	260000	0.015 (0.010)	0.1268
FEV1 and FEV1/FVC results are from Shrine, Nature Genetics 2019. The COPD results are from Sakornsakolpat, Nature Genetics 2019.
rs1690789, the functional variant in the TGFB2 locus, was included along with the lead GWAS variant in this region, rs796395.
rs138641402, rs76756075, rs145770770, and their LD proxies >0.8 were absent in at least one of the GWAS meta-analyses.
A SNP was considered validated if it was associated at p<0.05 with at least one of FEV1, FEV1/FVC, or COPD with a consistent direction of effect.

## Sheet: ST5.SmokingGWAS
SNP	Coded Allele	LHE		Smoking
		LHE pattern	P	P
rs56077333	A	Moderate Centrilobular	2.2e-13	5.3e-05
rs17368582	T		8.1e-12	0.85
rs56113850	T		1.5e-09	3.7e-08
rs796395	A		6.1e-09	0.49
rs1690789	T		6.3e-09	0.58
rs138641402	A		3.3e-08
rs138641402	A	Nonemphysematous	4.2e-08
rs7170068	A		4.8e-12	0.37
rs17368659	T		6.3e-11	0.92
rs28929474	T		6.2e-09	0.9
rs11852372	A	Panlobular	7.1e-12	5.8e-05
rs76756075	T		2e-08	1
rs78070126	T		2.8e-08	0.32
rs145770770	A		3.8e-08	0.44
rs9788721	T	Severe Centrilobular	3.7e-08	7.7e-05
rs379123	T		3.7e-08	0.36
GWAS results for smoking were obtained from the UK Biobank Pheweb browser (http://pheweb.sph.umich.edu:5000/) on July 7, 2019 for the phenotype: "Smoking status: Previous."

## Sheet: ST6.Colocalization>80,GWAS<5e-5
	GWAS	SNP	Tissue	GENES
	Moderate Centrilobular	rs796395	Fibroblasts	TGFB2
		rs12489068	Blood	DBR1
		rs10070279	Blood	HEXB
		rs1859788	Adipose	AGFG2, NYAP1
		rs1987580	Brain, Colon, Lung	STAG3, GJC3, AZGP1
		rs56077333	Fibroblasts, Testis	PSMA4, CHRNA5
		rs2024449	Brain	RBL2
		rs11078606	Muscle	WSCD1
		rs380267	Adipose, Heart, Muscle, Blood	LILRA3
		rs13053068	Testis	EEF1A1P1
	Moderate Centrilobular, Severe Centrilobular	rs754388	Colon	RIN3
	Moderate Centrilobular, Normal	rs56113850	Lung, Testis	CYP2A6, AKT2
	Normal	rs10926930	Artery	CEP170
		rs4870388	Heart	GINM1
		rs113895159	Colon, Lung, Nerve	SDCBP
		rs8006935	Brain, Esophagus, Blood	PPP2R3C
		rs11645097	Lung, Blood	SNTB2
		rs384116	Heart	LILRA3
		rs6082249	Skin	XRN2
		rs1459398	Testis	EEF1A1P1
	Panlobular	rs55951284	Brain	RP11-889L3.1
		rs28536201	Adipose, Artery, Esophagus, Nerve, Thyroid	RP11-435O5.5
		rs4008756	Muscle	DCAF12
		rs4090282	Nerve	ASTN2
		rs646586	Adipose, Artery, Brain, Lymphocytes, Fibroblasts, Colon, Esophagus, Heart, Liver, Nerve, Pituitary, Skin, Small, Thyroid, Uterus, Vagina, Blood, Blood	RP11-757G1.6, MRGPRF-AS1, IGHMBP2, RP11-554A11.4, MRPL21, MTL5
		rs9590614	Fibroblasts, Skin	RGCC
		rs8010344	Colon	RIN3
		rs11852372	Testis	CHRNA5
	Severe Centrilobular	rs6729910	Adipose, Artery, Brain, Breast, Lymphocytes, Colon, Esophagus, Heart, Muscle, Skin, Testis, Blood	RGPD8, ZC3H8
		rs2970877	Muscle, Blood	RP11-453O5.1, PPARGC1A
		rs1086268	Adipose, Artery, Breast, Fibroblasts, Lung, Muscle, Nerve, Skin	RP11-196H14.3, SRGAP1
		rs2268146	Adipose, Adrenal, Artery, Brain, Colon, Esophagus, Heart, Lung, Nerve, Skin, Thyroid, Blood	CLECL1, RP11-599J14.2, RP11-75L1.1, CLEC2D
		rs3782357	Lymphocytes, Muscle, Testis, Blood	PRKAG1, RP11-386G11.5, RP11-386G11.3, DDN
		rs799457	Nerve	FAM177A1
		rs4886591	Testis	CHRNA5
		rs141935908	Fibroblasts	C16orf62
		rs4239541	Muscle, Skin	ZNF414, MYO1F
	SNP - lead GWAS variant in locus.
	Tissue - tissue of origin for gene expression data in eQTL analysis.

## Sheet: ST7.GarfieldEnrichment
LHE Pattern	OR	Pvalue	Beta	SE	Cell Type	Tissue
Moderate	3.0007	2.5122e-05	1.09884	0.260779	Fetal_Lung_Left	fetal_lung
	2.91881	3.30735e-05	1.07118	0.25804	Fetal_Lung_Left	fetal_lung
	2.97801	2.91923e-05	1.09126	0.261086	Fetal_Lung_Left	fetal_lung
	3.00789	4.60664e-05	1.10124	0.27026	Fetal_Stomach	fetal_stomach
	2.96714	4.33008e-05	1.0876	0.265974	Fetal_Stomach	fetal_stomach
	3.16881	2.01775e-05	1.15336	0.270556	Fibroblasts_Fetal_Skin_Abdomen	fibroblast
	2.99266	4.31788e-05	1.09616	0.268025	Fibroblasts_Fetal_Skin_Abdomen	fibroblast
	3.11704	2.77097e-05	1.13688	0.271234	Fibroblasts_Fetal_Skin_Biceps_Left	fibroblast
	3.1696	2.13023e-05	1.15361	0.271387	Fibroblasts_Fetal_Skin_Biceps_Left	fibroblast
	3.00162	5.91139e-05	1.09915	0.273672	Fibroblasts_Fetal_Skin_Biceps_Right	fibroblast
	3.43899	3.32798e-06	1.23518	0.26566	Fibroblasts_Fetal_Skin_Biceps_Right	fibroblast
	3.17729	1.35575e-05	1.15603	0.265698	Fibroblasts_Fetal_Skin_Quadriceps_Left	fibroblast
	3.04072	4.8901e-05	1.11209	0.273859	Fibroblasts_Fetal_Skin_Quadriceps_Right	fibroblast
	3.25478	8.64487e-06	1.18013	0.265283	Fibroblasts_Fetal_Skin_Quadriceps_Right	fibroblast
	3.11575	2.71789e-05	1.13647	0.270852	Fibroblasts_Fetal_Skin_Scalp	fibroblast
Normal	3.54384	7.55263e-06	1.26521	0.282572	A549	epithelium
	3.21362	3.47264e-05	1.1674	0.281978	HAEpiC	epithelium
	3.33335	2.14365e-05	1.20398	0.28333	HBMEC	blood_vessel
	3.44218	1.64303e-05	1.2361	0.286893	HCFaa	heart
	3.29757	8.14766e-05	1.19319	0.302838	HCT-116	colon
	3.16125	5.00967e-05	1.15097	0.283827	HNPCEpiC	epithelium
	3.77716	2.07815e-06	1.32897	0.280039	HRE	epithelium
	4.01349	1.61032e-06	1.38966	0.289692	HTR8svn	blastula
	2.92991	7.87706e-05	1.07497	0.272275	Melano	skin
	3.43763	4.36679e-05	1.23478	0.302112	CD14_Primary_Cells	blood
	3.20817	3.44286e-05	1.1657	0.281434	Fibroblasts_Fetal_Skin_Abdomen	fibroblast
	3.11128	7.75484e-05	1.13503	0.287215	Fibroblasts_Fetal_Skin_Biceps_Left	fibroblast
	3.22083	4.54924e-05	1.16964	0.286841	Fibroblasts_Fetal_Skin_Biceps_Right	fibroblast
	3.44009	1.14144e-05	1.2355	0.281532	Fibroblasts_Fetal_Skin_Biceps_Right	fibroblast
	3.69727	2.34719e-06	1.30759	0.276976	Fibroblasts_Fetal_Skin_Quadriceps_Left	fibroblast
	3.45049	9.38298e-06	1.23852	0.279516	Fibroblasts_Fetal_Skin_Quadriceps_Left	fibroblast
	3.8118	1.99731e-06	1.3381	0.281486	Fibroblasts_Fetal_Skin_Quadriceps_Right	fibroblast
	4.42971	5.56916e-08	1.48833	0.273988	Fibroblasts_Fetal_Skin_Quadriceps_Right	fibroblast
	3.05661	9.69881e-05	1.11731	0.286635	Fibroblasts_Fetal_Skin_Scalp	fibroblast
	3.25625	3.3814e-05	1.18058	0.284742	Fibroblasts_Fetal_Skin_Upper_Back	fibroblast
	3.41849	8.97994e-06	1.2292	0.276823	Fibroblasts_Fetal_Skin_Upper_Back	fibroblast
	3.42395	1.17597e-05	1.23079	0.280875	H1_Derived_Mesenchymal_Stem_Cells	es_cell
	3.17673	4.86508e-05	1.15585	0.284552	IMR90	lung
	3.05442	4.17798e-05	1.11659	0.272511	Penis_Foreskin_Fibroblast_Primary_Cells	fibroblast
	3.49775	8.36095e-06	1.25212	0.281014	Penis_Foreskin_Keratinocyte_Primary_Cells	skin
Panlobular	3.08732	1.4181e-05	1.1273	0.259685	CD4_Primary_Cells	blood
OR = odds ratio of enrichment of LHE GWAS signals being present in DNaseI peaks of a given cell type or cell line.
SE = standard error
Cell type and tissue use the cell and tissue names as specified within the built-in epigenomic annotations in Garfield.
Garfield output of cell type enrichments with p<0.0001 of 4 LHE GWAS results. Relevant parameters: GWAS p-value threshold - 5x10-5, annotation type = DNaseI peaks, 5 minor allele frequency bins, 5 tag bins, and 5 TSS bins.

## Sheet: ST8.SherlockResults
GTEx eQTL Tissue	Gene	Pvalue	Log Bayes Factor
Fibroblast	PSMA4	1.1e-05	6.3
	ENSG00000261762 (antisense to CHRNA5)	1.1e-05	6.3
	CHRNA5	1.1e-05	6.2
	TGFB2	2e-05	5.8
	MMP1	3.2e-05	5.4
Lung	ENSG00000261762 (antisense to CHRNA5)	2.7e-05	5.6
	CHRNA5	4.1e-05	5.1
	MPP2	4.1e-05	5.1
	LILRA3	8.7e-05	4.4
Blood	PSMA4	1.3e-06	7.2
	ENSG00000223842 (long con-coding RNA)	5.3e-06	6.9
	DBR1	2.1e-05	5.8
Significant results (p<0.0001) from Sherlock analysis. Relevant parameters: cis expression prior = 1E-3, trans expression prior = 1E-5.

## Sheet: ST9.PICSResults
Index SNP	Linked SNP	Dprime	Rsquare	PICS probability
rs796395	rs796395	1	1	0.2317
rs796395	rs34876734	1	0.9947	0.1576
rs796395	rs1690789	1	0.9895	0.1342
rs796395	rs550238	1	0.9843	0.1184
rs796395	rs3009947	1	0.9586	0.0756
rs796395	rs622912	0.9946	0.9534	0.0701
rs796395	chr1:218670655	0.9734	0.9326	0.0532
SNPs with PICS (https://pubs.broadinstitute.org/pubs/finemapping/pics.php) estimated causal probability >5% in the TGFB2 locus.
Index SNP = lead GWAS variant whhose p-value is entered into the PICS algorithm.
Linked SNP = SNP in linkage disequilibrium with lead GWAS variant in 1000 Genomes EUR population.
PICS probability - estimated probability that the linked SNP is responsible for the observed GWAS association.

## Sheet: ST10.3CPrimers
Name	Primers
TGFb2-Promoter	TTCACCATGTCTGGCACTATC
TGFb2-Positive Control	AGCTCTTCCTTTGCACTCTTAC
TGFb2-Negative Control	CAGTGGTAAAATATAATCCCTCCTTCA
rs1690789	CTTTGCCTGGGAGGACTTTAT
Primer sequences for 3C expderiment.

[truncated: 1 more sheets: ST11.CRISPRqPCR]
